# Supplementary material
Source: MDPI journal article supplement (https://www.mdpi.com/2072-4292/7/10/12859)
Supplement: s1 [file s1]

## *Supplementary Information*

# **In-Season Mapping of Crop Type with Optical and X-Band SAR Data: A Classification Tree Approach Using Synoptic Seasonal Features**

**Paolo Villa \*, Daniela Stroppiana, Giacomo Fontanelli, Ramin Azar and Pietro Alessandro Brivio**

Institute for Electromagnetic Sensing of the Environment, National Research Council (IREA-CNR), via Bassini 15, Milan 20133, Italy

## **Supplementary Information**

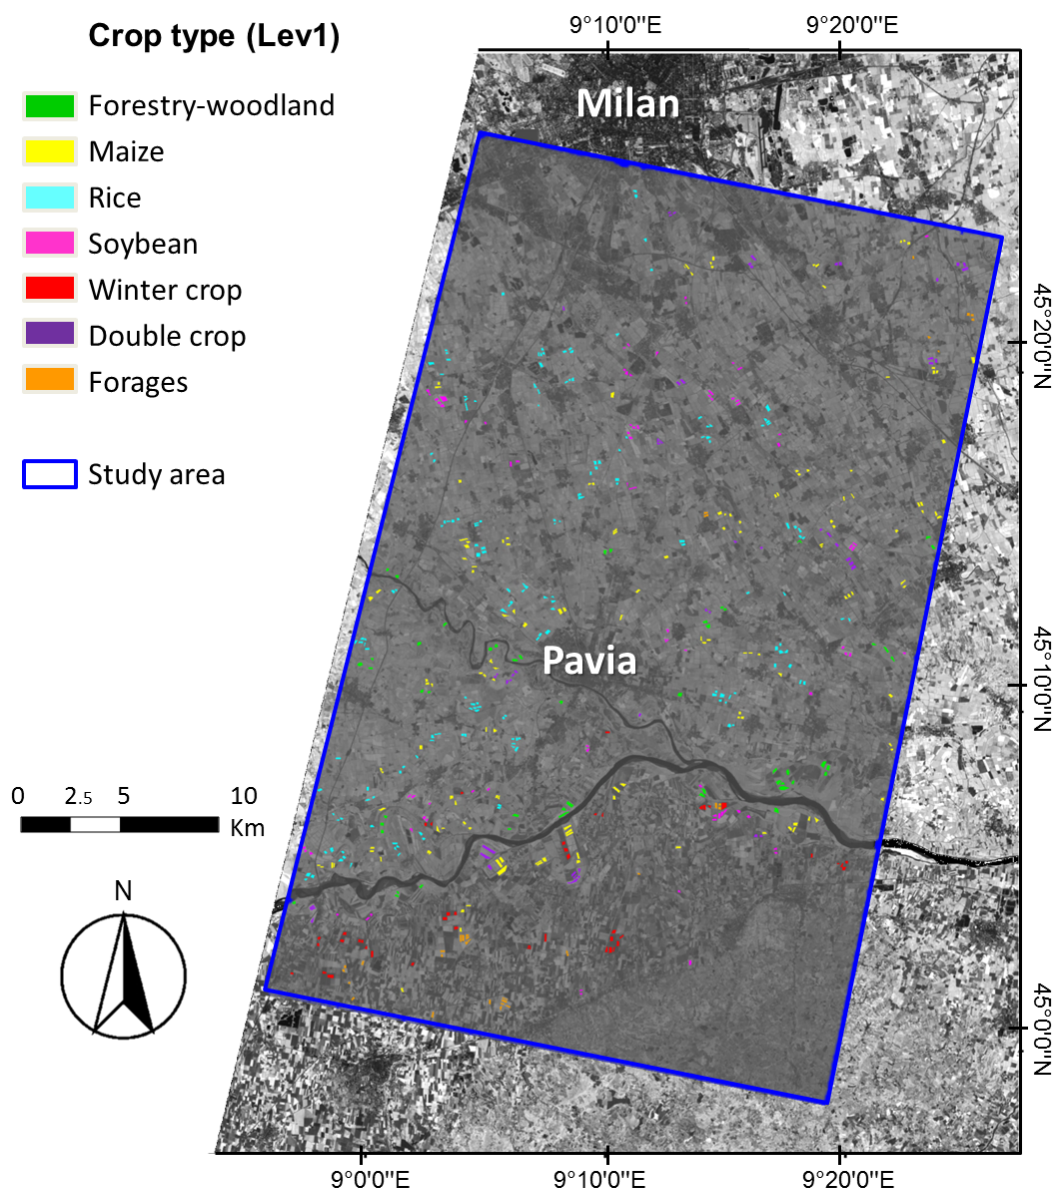

**Figure S1.** Distribution of fields sampled for the reference dataset derived from CUAA 2013 map and used for training and validation of the crop mapping approach implemented. Image background is mid-July EVI (16 July 2013) layer, represented in grey tones.

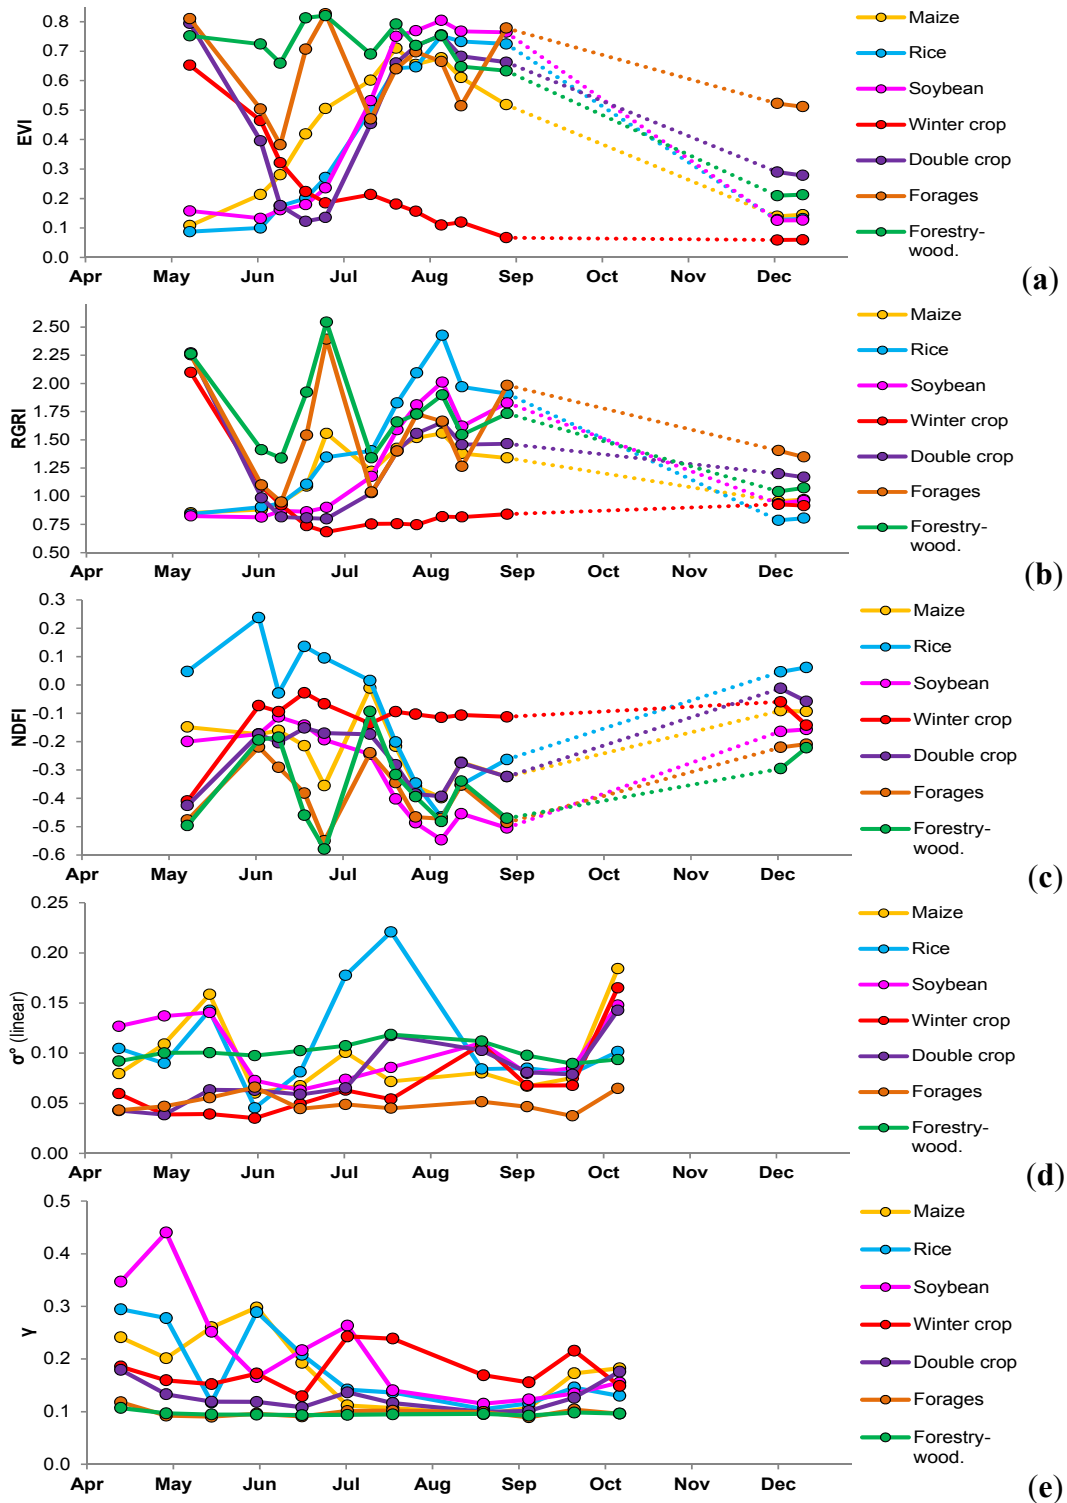

**Figure S2.** Average multi-temporal profiles of L1 crop classes for the five seasonal proxies tested: (a) EVI, (b) NDFI, (c) RGRl, (d)  $\sigma^\circ$ , (e)  $\gamma$ . Profiles are derived from optical and X-band SAR data of development dataset (year 2013) over the fields used as training samples for the approach implementation.
